# Supplementary material
Source: PubMed Central journal article supplement (PMC7610370)
Supplement: EMS115714-supplement-Supplementary_Tables_1_8.pdf [file EMS115714-supplement-Supplementary_Tables_1_8.pdf]

**Supplementary Table 1 | List of *Bgt* isolates used to characterize the resistance spectra of *Pm4a* and *Pm4b*.** The first column corresponds to the name of the *Bgt* isolate, followed by the geographic origin and collection site (if available) and the source. The last two columns show the disease reactions of Fed-*Pm4a* and Fed-*Pm4b* NILs distinguishing five classes of host reactions R = resistance (0-10% of leaf area covered), IR (10-25% of leaf area covered), I (25-50% of leaf area covered), IS (50-75 % of leaf area covered) and S (>75% of leaf area covered). Infection test is based on four biological replicates. CHN: China, ISR: Israel; CHE; Switzerland; FRA: France; USA: United States; GRB: Great Britain; JPN; Japan.

| <i>Bgt</i>        | Origin | Collection site  | Source <sup>1-4</sup> | Fed- <i>Pm4a</i> | Fed- <i>Pm4b</i> |
|-------------------|--------|------------------|-----------------------|------------------|------------------|
| CHE_94202         | CHE    |                  | Wicker et al. 2013    | R                | R                |
| CHE_96224         | CHE    |                  | Wicker et al. 2013    | R                | R                |
| CHE_96249         | CHE    |                  | in-house collection   | R                | R                |
| CHE_97223         | CHE    |                  | in-house collection   | R                | R                |
| CHN_10_8          | CHN    | Yunnan province  | Zeng et al. 2014      | R                | R                |
| CHN_12_50         | CHN    | Guizhou province | Zeng et al. 2014      | R                | R                |
| CHN_19_11         | CHN    | Jiangsu province | Zeng et al. 2014      | R                | R                |
| CHN_28_9          | CHN    |                  | Zeng et al. 2014      | R                | R                |
| CHN_36_70         | CHN    | Hebei province   | Zeng et al. 2014      | R                | R                |
| CHN_39_1          | CHN    |                  | Zeng et al. 2014      | R                | R                |
| CHN_46_31         | CHN    | Gansu province   | Zeng et al. 2014      | R                | R                |
| CHN_6_69          | CHN    | Shannxi province | Zeng et al. 2014      | R                | R                |
| CHN_7_8           | CHN    | Shannxi province | Zeng et al. 2014      | R                | R                |
| FRA_B_Stone_95-45 | FRA    |                  | McNally et al. 2018   | R                | R                |
| ISR_1             | ISR    | Hula             | McNally et al. 2018   | R                | R                |
| ISR_103I          | ISR    | Amiad            | Menardo et al. 2016   | R                | R                |
| ISR_103K          | ISR    |                  | Menardo et al. 2016   | R                | R                |
| ISR_113           | ISR    | Amiad            | McNally et al. 2018   | R                | R                |
| ISR_13            | ISR    | Hula             | McNally et al. 2018   | R                | R                |
| ISR_16            | ISR    | Nahal Oz         | McNally et al. 2018   | R                | R                |
| ISR_20            | ISR    | Ein Hanaziv      | McNally et al. 2018   | R                | R                |
| ISR_204           | ISR    |                  | Menardo et al. 2016   | R                | R                |
| ISR_217           | ISR    |                  | Menardo et al. 2016   | R                | R                |
| ISR_218           | ISR    | Tel Far          | McNally et al. 2018   | R                | R                |
| ISR_219           | ISR    | Bizaron          | McNally et al. 2018   | R                | R                |
| ISR_30P           | ISR    | Talmei Yafe      | McNally et al. 2018   | R                | R                |
| ISR_30w           | ISR    | Talmei Yafe      | McNally et al. 2018   | R                | R                |
| ISR_37            | ISR    | Nahal Oz         | McNally et al. 2018   | R                | R                |
| ISR_43            | ISR    | Yesodot          | McNally et al. 2018   | R                | R                |
| ISR_44            | ISR    | Negev            | McNally et al. 2018   | R                | R                |
| ISR_50            | ISR    | Nahal Oz         | McNally et al. 2018   | R                | R                |
| ISR_52            | ISR    | DirEIBalakh      | McNally et al. 2018   | R                | R                |
| ISR_6             | ISR    | Hula             | McNally et al. 2018   | R                | R                |
| ISR_67            | ISR    | Lahav            | McNally et al. 2018   | R                | R                |
| ISR_70            | ISR    |                  | Menardo et al. 2016   | R                | R                |
| ISR_94            | ISR    | Ein Hanaziv      | McNally et al. 2018   | R                | R                |
| ISR_97            | ISR    |                  | Menardo et al. 2016   | R                | R                |

|                  |     |                  |                     |    |    |
|------------------|-----|------------------|---------------------|----|----|
| CHN_5_112        | CHN |                  | Zeng et al. 2014    | R  | IR |
| CHN_5_83         | CHN | Shannxi province | Zeng et al. 2014    | R  | IR |
| CHN_5_93         | CHN |                  | Zeng et al. 2014    | R  | IR |
| CHN_51_3         | CHN |                  | Zeng et al. 2014    | R  | IR |
| CHN_6_21         | CHN |                  | Zeng et al. 2014    | R  | IR |
| CHN_9_43         | CHN |                  | Zeng et al. 2014    | R  | IR |
| CHN_HB_22        | CHN |                  | Zeng et al. 2014    | R  | IR |
| CHN_NJ_16        | CHN |                  | Zeng et al. 2014    | R  | IR |
| ISR_205          | ISR | Kfar-Menahem     | McNally et al 2018  | R  | IR |
| ISR_209          | ISR | K. Revhaya       | Menardo et al. 2016 | R  | IR |
| ISR_214          | ISR | Akko             | McNally et al 2018  | R  | IR |
| ISR_7            | ISR | Hula             | Menardo et al. 2016 | R  | IR |
| ISR_9            | ISR | Hula             | McNally et al 2018  | R  | IR |
| CHE_97266        | CHE |                  | in-house collection | IR | R  |
| ISR_106          | ISR | Nahal Oz         | McNally et al 2018  | IR | R  |
| ISR_107          | ISR | Nahal Oz         | McNally et al 2018  | IR | R  |
| ISR_217          | ISR | Kfa Hasidim      | Menardo et al. 2016 | IR | R  |
| ISR_96           | ISR | Negba            | McNally et al 2018  | IR | R  |
| CHN_13_51        | CHN | Guizhou province | Zeng et al. 2014    | R  | I  |
| CHN_14_32        | CHN |                  | Zeng et al. 2014    | R  | I  |
| CHN_15_9         | CHN |                  | Zeng et al. 2014    | R  | I  |
| CHN_21_1         | CHN |                  | Zeng et al. 2014    | R  | I  |
| CHN_37_38        | CHN |                  | Zeng et al. 2014    | R  | I  |
| CHN_40_2         | CHN |                  | Zeng et al. 2014    | R  | I  |
| CHN_41_5         | CHN |                  | Zeng et al. 2014    | R  | I  |
| ISR_210          | ISR | Givat HaMoreh    | McNally et al 2018  | I  | IR |
| ISR_216          | ISR | Ein Shemer       | McNally et al 2018  | IS | IR |
| CHN_2_39         | CHN |                  | Zeng et al. 2014    | R  | S  |
| CHE_7004         | CHE |                  | Menardo et al. 2016 | S  | R  |
| CHE_7230         | CHE |                  | McNally et al 2018  | S  | R  |
| CHE_7234         | CHE |                  | in-house collection | S  | R  |
| CHE_10001        | CHE |                  | in-house collection | S  | R  |
| CHE_98013        | CHE |                  | in-house collection | S  | R  |
| CHN_52-27        | CHN | Xinjiang         | Zeng et al. 2014    | S  | R  |
| FRA_Syros2000_15 | FRA |                  | McNally et al 2018  | S  | R  |
| ISR_208          | ISR | Gilboa           | Menardo et al. 2016 | S  | R  |
| ISR_8            | ISR | Hula             | Menardo et al. 2016 | S  | R  |
| JPN_CHIKARA      | JPN |                  | McNally et al 2018  | S  | R  |
| USA_C3-1         | USA |                  | McNally et al 2018  | S  | R  |
| CHN_HB_21        | CHN | Hubei province   | Zeng et al. 2014    | S  | IR |
| CHN_1_47         | CHN |                  | Zeng et al. 2014    | I  | S  |
| CHN_2_5          | CHN |                  | Zeng et al. 2014    | I  | S  |
| CHN_1_19         | CHN | Sichuan province | Zeng et al. 2014    | S  | S  |
| CHN_1_62         | CHN |                  | Zeng et al. 2014    | S  | S  |
| CHN_10_40        | CHN |                  | Zeng et al. 2014    | S  | S  |
| CHN_11_61        | CHN |                  | Zeng et al. 2014    | S  | S  |
| CHN_12_24        | CHN |                  | Zeng et al. 2014    | S  | S  |

|           |     |                   |                    |   |   |
|-----------|-----|-------------------|--------------------|---|---|
| CHN_12_3  | CHN |                   | Zeng et al. 2014   | S | S |
| CHN_12_82 | CHN |                   | Zeng et al. 2014   | S | S |
| CHN_13_76 | CHN |                   | Zeng et al. 2014   | S | S |
| CHN_15_11 | CHN |                   | Zeng et al. 2014   | S | S |
| CHN_17_40 | CHN | Anhui province    | Zeng et al. 2014   | S | S |
| CHN_18_1  | CHN |                   | Zeng et al. 2014   | S | S |
| CHN_18_11 | CHN |                   | Zeng et al. 2014   | S | S |
| CHN_18_38 | CHN |                   | Zeng et al. 2014   | S | S |
| CHN_18_45 | CHN |                   | Zeng et al. 2014   | S | S |
| CHN_2_25  | CHN | Sichuan province  | Zeng et al. 2014   | S | S |
| CHN_2_65  | CHN |                   | Zeng et al. 2014   | S | S |
| CHN_24_4  | CHN | Jiangsu province  | Zeng et al. 2014   | S | S |
| CHN_30_1  | CHN | Anhui province    | Zeng et al. 2014   | S | S |
| CHN_35_1  | CHN |                   | Zeng et al. 2014   | S | S |
| CHN_35_18 | CHN |                   | Zeng et al. 2014   | S | S |
| CHN_36_3  | CHN |                   | Zeng et al. 2014   | S | S |
| CHN_39_19 | CHN |                   | Zeng et al. 2014   | S | S |
| CHN_39_5  | CHN |                   | Zeng et al. 2014   | S | S |
| CHN_44_3  | CHN | Shandong province | Zeng et al. 2014   | S | S |
| CHN_45_10 | CHN | Gansu province    | Zeng et al. 2014   | S | S |
| CHN_45_6  | CHN | Gansu province    | Zeng et al. 2014   | S | S |
| CHN_46_25 | CHN | Gansu province    | Zeng et al. 2014   | S | S |
| GRB_JIW2  | GRB |                   | Wicker et al. 2013 | S | S |

**Supplementary Table 2 | List of EMS-induced Pm4a and Pm4b mutants used in this study.** The given name of each mutant (first column) is followed by the donor line, *Fed-Pm4a* or *Fed-Pm4b*, where the EMS treatment was performed. In the column Mutation, the first letter indicates the amino acid in the wild-type followed by the position and the amino acid change in the corresponding mutant. Last column denotes the predicted domain based delimited based on Conserved Domain Database (CDD) from NCBI, where S\_TKc (c121453) corresponds to the serine/threonine kinase domain, C2C and C2D (c114603) to C2 domain third and fourth repeat found in Multiple C2 domain and Transmembrane regions Proteins (MCTP). Finally, PRT\_C (pfam08372) denotes the plant phosphoribosyltransferase C-terminal domain. The last three columns display the reactions of the EMS-derived mutants after inoculation with *Bgt94202*, *Bgt96224* and *BgtJ1W2*. Values refer to percentage of the surface area of tested leaf segments infected (means of four biological replicates  $\pm$  SE).

| Mutant name            | Source          | Mutation     | Affected domain | <i>Bgt94202</i> | <i>Bgt96224</i> | <i>BgtJ1W2</i>  |
|------------------------|-----------------|--------------|-----------------|-----------------|-----------------|-----------------|
| pm4b_m7                | <i>Fed-Pm4b</i> | S390F        | spacer          | 82.5 $\pm$ 4.3  | 85.0 $\pm$ 5.0  | 85.0 $\pm$ 5.0  |
| pm4b_m89               | <i>Fed-Pm4b</i> | P497L        | C2C             | 80.0 $\pm$ 0.0  | 82.5 $\pm$ 4.3  | 85.0 $\pm$ 5.0  |
| pm4b_m123 <sup>e</sup> | <i>Fed-Pm4b</i> | G132D        | S_TKc           | 80.0 $\pm$ 0.0  | 77.5 $\pm$ 8.3  | 85.0 $\pm$ 5.0  |
| pm4b_m125              | <i>Fed-Pm4b</i> | G234D        | S_TKc           | 80.0 $\pm$ 0.0  | 80.0 $\pm$ 10.0 | 87.5 $\pm$ 4.3  |
| pm4b_m151 <sup>e</sup> | <i>Fed-Pm4b</i> | P184L        | S_TKc           | 80.0 $\pm$ 0.0  | 80.0 $\pm$ 7.1  | 90.0 $\pm$ 0.0  |
| pm4b_m180              | <i>Fed-Pm4b</i> | G665S        | PRT_C           | 70.0 $\pm$ 7.1  | 80.0 $\pm$ 7.1  | 85.0 $\pm$ 5.0  |
| pm4b_m207 <sup>e</sup> | <i>Fed-Pm4b</i> | D170N        | S_TKc           | 72.5 $\pm$ 8.3  | 80.0 $\pm$ 7.1  | 85.0 $\pm$ 5.0  |
| pm4b_m244              | <i>Fed-Pm4b</i> | Q588*; R737W | PRT_C           | 72.5 $\pm$ 8.3  | 80.0 $\pm$ 7.1  | 87.5 $\pm$ 4.3  |
| pm4b_m256 <sup>e</sup> | <i>Fed-Pm4b</i> | G659D        | PRT_C           | 75.0 $\pm$ 11.2 | 85.0 $\pm$ 5.0  | 85.0 $\pm$ 8.7  |
| pm4b_m324              | <i>Fed-Pm4b</i> | T622M        | PRT_C           | 82.5 $\pm$ 8.3  | 85.0 $\pm$ 5.0  | 90.0 $\pm$ 0.0  |
| pm4b_m360              | <i>Fed-Pm4b</i> | G659D        | PRT_C           | 80.0 $\pm$ 7.1  | 85.0 $\pm$ 5.0  | 90.00 $\pm$ 0.0 |
| pm4b_m445              | <i>Fed-Pm4b</i> | Q14*         | spacer          | 85.0 $\pm$ 5.0  | 85.0 $\pm$ 5.0  | 90.0 $\pm$ 0.0  |
| pm4b_m467              | <i>Fed-Pm4b</i> | Y626N        | PRT_C           | 85.0 $\pm$ 5.0  | 85.0 $\pm$ 5.0  | 80.0 $\pm$ 0.0  |
| pm4b_m495 <sup>e</sup> | <i>Fed-Pm4b</i> | Q274*        | S_TKc           | 82.5 $\pm$ 4.3  | 82.5 $\pm$ 4.3  | 80.0 $\pm$ 0.0  |
| pm4b_m510              | <i>Fed-Pm4b</i> | V477M        | C2C             | 85.0 $\pm$ 5.0  | 80.0 $\pm$ 7.1  | 87.5 $\pm$ 4.3  |
| pm4b_m526 <sup>e</sup> | <i>Fed-Pm4b</i> | R291K        | S_TKc           | 80.0 $\pm$ 7.1  | 85.0 $\pm$ 5.0  | 90.0 $\pm$ 0.0  |
| pm4b_m532 <sup>e</sup> | <i>Fed-Pm4b</i> | G104E        | S_TKc           | 82.5 $\pm$ 8.3  | 80.0 $\pm$ 7.1  | 77.5 $\pm$ 4.3  |
| pm4b_m641 <sup>e</sup> | <i>Fed-Pm4b</i> | G45E         | S_TKc           | 80.0 $\pm$ 7.1  | 82.5 $\pm$ 8.3  | 85.0 $\pm$ 5.0  |
| pm4a_m077              | <i>Fed-Pm4a</i> | D188N        | S_TKc           | 85.0 $\pm$ 5.0  | 80.0 $\pm$ 7.1  | 85.0 $\pm$ 5.0  |
| pm4a_m102              | <i>Fed-Pm4a</i> | Q719R        | PRT_C           | 87.5 $\pm$ 4.3  | 75.0 $\pm$ 5.0  | 85.0 $\pm$ 5.0  |
| pm4a_m113              | <i>Fed-Pm4a</i> | E183K        | S_TKc           | 85.0 $\pm$ 5.0  | 80.0 $\pm$ 7.1  | 87.5 $\pm$ 4.3  |
| pm4a_m177              | <i>Fed-Pm4a</i> | T204I;P688L  | S_TKc           | 70.0 $\pm$ 0.0  | 80.0 $\pm$ 7.1  | 85.0 $\pm$ 5.0  |
| pm4a_m188              | <i>Fed-Pm4a</i> | G562D        | spacer          | 70.0 $\pm$ 0.0  | 82.5 $\pm$ 4.3  | 85.0 $\pm$ 5.0  |
| pm4a_m226              | <i>Fed-Pm4a</i> | W681*        | PRT_C           | 75.0 $\pm$ 5.0  | 80.0 $\pm$ 7.1  | 85.0 $\pm$ 5.0  |
| pm4a_m247              | <i>Fed-Pm4a</i> | L261F        | S_TKc           | 80.0 $\pm$ 7.1  | 77.5 $\pm$ 8.3  | 85.0 $\pm$ 5.0  |
| pm4a_m280              | <i>Fed-Pm4a</i> | P617S        | PRT_C           | 72.5 $\pm$ 8.3  | 77.5 $\pm$ 4.3  | 85.0 $\pm$ 5.0  |
| pm4a_m293              | <i>Fed-Pm4a</i> | G190D        | S_TKc           | 75.0 $\pm$ 5.0  | 80.0 $\pm$ 7.1  | 85.0 $\pm$ 5.0  |
| pm4a_m366              | <i>Fed-Pm4a</i> | G317S        | C2D             | 80.0 $\pm$ 7.1  | 80.0 $\pm$ 7.1  | 85.0 $\pm$ 5.0  |
| pm4a_m398              | <i>Fed-Pm4a</i> | E217K        | S_TKc           | 80.0 $\pm$ 7.1  | 82.5 $\pm$ 4.3  | 85.0 $\pm$ 5.0  |
| pm4a_m425              | <i>Fed-Pm4a</i> | V118I        | S_TKc           | 85.0 $\pm$ 5.0  | 77.5 $\pm$ 4.3  | 85.0 $\pm$ 5.0  |
| pm4a_m448              | <i>Fed-Pm4a</i> | A100T        | S_TKc           | 80.0 $\pm$ 7.1  | 77.5 $\pm$ 4.3  | 85.0 $\pm$ 5.0  |
| pm4a_m507              | <i>Fed-Pm4a</i> | P617L        | PRT_C           | 80.0 $\pm$ 7.1  | 80.0 $\pm$ 7.1  | 82.5 $\pm$ 4.3  |

<sup>e</sup>Mutants subjected to chromosome flow sorting and MutChromSeq, and then confirmed by Sanger sequencing

**Supplementary Table 3** | Disease reactions of selected T2 families challenged with selected *Bgt* isolates. The first column displays the name of each progeny. Second and third column indicates the presence (+) or absence (-) of the transgenes *Pm4b\_V1CDS*- and *Pm4b\_V2CDS* (See Methods). The remaining columns show the disease reaction of each T2 line challenged with two *Pm4a/b*-avirulent (*Bgt96224* and *Bgt94202*) and two *Pm4a/b*-virulent (*BgtJIW2* and *Bgt97251*) isolates. Top four rows show the disease reactions of the Fed-*Pm4a* and the Fed-*Pm4b* NILs genotypes, Bobwhite S26, the susceptible background where transgenic complementation assays were performed, and Kanzler, a highly susceptible cultivar to *Bgt*. Five classes of host reactions were considered. R = resistance (0-10% of leaf area covered), IR (10-25% of leaf area covered), I (25-50% of leaf area covered), IS (50-75 % of leaf area covered) and S (>75% of leaf area covered). Evaluation was done 7-9 dpi.

| T2_line          | Pm4b_V1CDS | Pm4b_V2CDS | <i>Bgt96224</i> | <i>Bgt94202</i> | <i>BgtJIW2</i> | <i>Bgt97251</i> |
|------------------|------------|------------|-----------------|-----------------|----------------|-----------------|
| Fed- <i>Pm4a</i> | -          | -          | R               | R               | S              | S               |
| Fed- <i>Pm4b</i> | -          | -          | R               | R               | S              | S               |
| Bobwhite S26     | -          | -          | S               | S               | S              | S               |
| Kanzler          | -          | -          | S               | S               | S              | S               |
| T2#3-2.12_1.1    | +          | +          | R               | R               | S              | IS              |
| T2#3-2.12_1.2    | +          | +          | R               | R               | S              | S               |
| T2#3-2.12_1.4    | +          | +          | R               | R               | IS             | IS              |
| T2#3-2.12_1.5    | +          | +          | IR              | R               | S              | S               |
| T2#3-2.12_1.6    | +          | +          | R               | R               | IS             | IS              |
| T2#3-2.12_1.7    | +          | +          | R               | R               | IS             | IS              |
| T2#3-2.12_1.8    | +          | +          | R               | R               | IS             | S               |
| T2#3-2.12_1.9    | +          | +          | R               | R               | S              | S               |
| T2#3-2.12_1.10   | +          | +          | R               | R               | S              | S               |
| T2#3-2.12_1.11   | +          | +          | R               | R               | S              | S               |
| T2#3-2.12_1.12   | +          | +          | R               | R               | S              | IS              |
| T2#3-2.12_1.13   | +          | +          | R               | R               | S              | S               |
| T2#3-2.12_1.14   | +          | +          | R               | R               | S              | S               |
| T2#3-2.12_1.15   | +          | +          | R               | R               | S              | S               |
| T2#3-2.12_1.16   | +          | +          | R               | R               | S              | S               |
| T2#3-2.13_1.1    | -          | -          | S               | S               | S              | IS              |
| T2#3-2.13_1.2    | +          | +          | IR              | IS              | S              | S               |
| T2#3-2.13_1.3    | -          | -          | S               | S               | S              | S               |
| T2#3-2.13_1.4    | +          | +          | IS              | IR              | S              | S               |
| T2#3-2.13_1.5    | -          | -          | S               | S               | S              | IS              |
| T2#3-2.13_1.6    | +          | +          | R               | R               | S              | S               |
| T2#3-2.13_1.7    | +          | +          | IR              | IR              | IS             | IS              |
| T2#3-2.13_1.8    | +          | +          | R               | R               | S              | S               |
| T2#3-2.13_1.9    | +          | +          | R               | R               | S              | S               |
| T2#3-2.13_1.10   | +          | +          | IR              | R               | S              | S               |
| T2#3-2.13_1.11   | +          | +          | R               | R               | S              | S               |
| T2#3-2.13_1.12   | +          | +          | R               | IR              | S              | S               |
| T2#3-2.13_1.13   | +          | +          | R               | IR              | S              | S               |
| T2#3-2.13_1.14   | +          | +          | R               | R               | S              | S               |
| T2#3-2.13_1.16   | +          | +          | IS              | S               | S              | S               |
| T2#25-1.8_1.1    | +          | +          | IS              | S               | S              | S               |

|                 |   |   |    |    |    |    |
|-----------------|---|---|----|----|----|----|
| T2#25-1.8_1.2   | + | + | I  | S  | S  | S  |
| T2#25-1.8_1.3   | + | + | R  | R  | S  | S  |
| T2#25-1.8_1.4   | + | + | I  | IS | S  | S  |
| T2#25-1.8_1.5   | + | + | R  | IR | S  | S  |
| T2#25-1.8_1.6   | + | + | R  | I  | S  | S  |
| T2#25-1.8_1.8   | + | + | R  | R  | S  | IS |
| T2#25-1.8_1.10  | + | + | S  | S  | S  | S  |
| T2#25-1.8_1.11  | + | + | R  | IR | S  | S  |
| T2#25-1.8_1.12  | + | + | R  | R  | S  | IS |
| T2#25-1.8_1.13  | + | + | R  | R  | S  | S  |
| T2#25-1.8_1.14  | + | + | R  | IS | S  | S  |
| T2#25-1.8_1.16  | - | - | IS | S  | S  | S  |
| T2#25-1.11_1.1  | + | + | I  | R  | S  | S  |
| T2#25-1.11_1.2  | + | + | R  | R  | S  | S  |
| T2#25-1.11_1.3  | + | + | IS | R  | S  | S  |
| T2#25-1.11_1.4  | + | + | IR | R  | S  | IS |
| T2#25-1.11_1.6  | + | + | R  | IR | IS | S  |
| T2#25-1.11_1.7  | + | + | R  | R  | S  | S  |
| T2#25-1.11_1.8_ | - | - | S  | S  | S  | S  |
| T2#25-1.11_1.9  | + | + | R  | R  | S  | S  |
| T2#25-1.11_1.11 | + | + | IR | IR | S  | S  |
| T2#25-1.11_1.12 | + | + | R  | R  | S  | S  |
| T2#25-1.11_1.13 | - | - | IR | IS | S  | IS |
| T2#25-1.11_1.14 | - | - | S  | S  | S  | S  |
| T2#25-1.11_1.15 | + | + | R  | R  | IS | IS |
| T2#25-1.11_1.16 | + | + | R  | R  | IS | IS |
| T2#52-1.4_1.1   | - | - | S  | S  | S  | S  |
| T2#52-1.4_1.2   | - | - | S  | S  | S  | S  |
| T2#52-1.4_1.3   | - | - | S  | S  | S  | S  |
| T2#52-1.4_1.4   | - | - | S  | S  | S  | S  |
| T2#52-1.4_1.5   | - | - | I  | S  | S  | S  |
| T2#52-1.4_1.6   | - | - | I  | S  | S  | IS |
| T2#52-1.4_1.7   | - | - | IS | S  | S  | IS |
| T2#52-1.4_1.8   | - | - | IS | S  | S  | IS |
| T2#52-1.4_1.9   | + | + | R  | R  | S  | S  |
| T2#52-1.4_1.10  | + | + | R  | R  | S  | IS |
| T2#52-1.4_1.11  | - | - | I  | S  | S  | S  |
| T2#52-1.4_1.12  | + | + | R  | R  | S  | IS |
| T2#52-1.4_1.13  | + | + | R  | R  | S  | S  |
| T2#52-1.4_1.14  | + | + | R  | R  | S  | IS |
| T2#52-1.4_1.15  | + | + | R  | R  | S  | S  |
| T2#52-1.4_1.16  | + | + | R  | R  | S  | IS |
| T2#52-3.11_1.2  | + | + | R  | R  | S  | IS |
| T2#52-3.11_1.3  | + | + | R  | R  | S  | IS |
| T2#52-3.11_1.5  | + | + | R  | R  | S  | S  |
| T2#52-3.11_1.7  | + | + | R  | R  | S  | S  |
| T2#52-3.11_1.8  | + | + | R  | R  | S  | S  |

|                 |   |   |   |   |    |    |
|-----------------|---|---|---|---|----|----|
| T2#52-3.11_1.11 | + | + | R | R | S  | IS |
| T2#52-3.11_1.12 | + | + | R | R | S  | S  |
| T2#52-3.11_1.13 | + | + | R | R | S  | S  |
| T2#52-3.14_1.2  | + | + | R | R | S  | IS |
| T2#52-3.14_1.3  | + | + | R | R | IS | IS |
| T2#52-3.14_1.4  | + | + | R | R | S  | S  |
| T2#52-3.14_1.7  | + | + | R | R | IS | S  |
| T2#52-3.14_1.9  | + | + | R | R | IS | S  |
| T2#52-3.14_1.12 | + | + | R | R | S  | S  |
| T2#52-3.14_1.14 | + | + | R | R | I  | IS |
| T2#52-3.14_1.16 | + | + | R | R | S  | IS |

**Supplementary Table 4 | Disease reactions of selected T1 transgenic lines overexpressing *Pm4b\_V1* or *Pm4b\_V2* challenged with selected *Bgt* isolates.** The first column displays the name of each progeny. Second column displays the *Pm4b* splicing variant transformed: either *Pm4b\_V1CDS* or *Pm4b\_V2CDS*. The third column, named detection, indicates the presence (+) or absence (-) of the corresponding transgenes: *Pm4b\_V1CDS* or *Pm4b\_V2CDS*. The remaining columns show the disease reaction of each T1 transgenic line challenged with two *Pm4a/b*-avirulent (*Bgt96224* and *Bgt94202*) and one *Pm4a/b*-virulent (*BgtJIW2*). Top four rows show the disease reactions of the Fed-*Pm4a*, Fed-*Pm4b*, Bobwhite S26, the susceptible background where transgenic complementation assays were performed, and Kanzler, a highly susceptible cultivar to *Bgt*. Five classes of host reactions were considered. R = resistance (0-10% of leaf area covered), IR (10-25% of leaf area covered), I (25-50% of leaf area covered), IS (50-75 % of leaf area covered) and S (>75% of leaf area covered)

| Line             | Transgene         | Detection | <i>Bgt96224</i> | <i>Bgt94202</i> | <i>BgtJIW2</i> |
|------------------|-------------------|-----------|-----------------|-----------------|----------------|
| Fed- <i>Pm4a</i> | -                 |           | R               | R               | R              |
| Fed- <i>Pm4b</i> | -                 |           | R               | R               | R              |
| Bobwhite S26     | -                 |           | S               | S               | S              |
| Kanzler          | -                 |           | S               | S               | S              |
| T1#9_2.1         | <i>Pm4b_V1CDS</i> | +         | S               | S               | S              |
| T1#9_2.2         | <i>Pm4b_V1CDS</i> | +         | S               | S               | S              |
| T1#9_2.3         | <i>Pm4b_V1CDS</i> | +         | S               | S               | S              |
| T1#9_2.4         | <i>Pm4b_V1CDS</i> | +         | S               | S               | S              |
| T1#9_2.5         | <i>Pm4b_V1CDS</i> | +         | S               | S               | S              |
| T1#9_2.8         | <i>Pm4b_V1CDS</i> | +         | S               | S               | S              |
| T1#9_2.9         | <i>Pm4b_V1CDS</i> | +         | S               | S               | S              |
| T1#9_2.10        | <i>Pm4b_V1CDS</i> | +         | S               | S               | S              |
| T1#9_2.11        | <i>Pm4b_V1CDS</i> | +         | S               | S               | S              |
| T1#9_2.12        | <i>Pm4b_V1CDS</i> | +         | S               | S               | S              |
| T1#9_2.13        | <i>Pm4b_V1CDS</i> | +         | S               | S               | S              |
| T1#9_2.14        | <i>Pm4b_V1CDS</i> | -         | S               | S               | S              |
| T1#9_2.15        | <i>Pm4b_V1CDS</i> | +         | S               | S               | S              |
| T1#9_2.16        | <i>Pm4b_V1CDS</i> | +         | S               | S               | S              |
| T1#12_2.1        | <i>Pm4b_V1CDS</i> | +         | S               | S               | S              |
| T1#12_2.2        | <i>Pm4b_V1CDS</i> | +         | S               | S               | S              |
| T1#12_2.3        | <i>Pm4b_V1CDS</i> | +         | S               | S               | S              |
| T1#12_2.4        | <i>Pm4b_V1CDS</i> | +         | S               | S               | S              |
| T1#12_2.5        | <i>Pm4b_V1CDS</i> | -         | S               | S               | S              |
| T1#12_2.6        | <i>Pm4b_V1CDS</i> | -         | S               | S               | S              |
| T1#12_2.7        | <i>Pm4b_V1CDS</i> | +         | S               | S               | S              |
| T1#12_2.8        | <i>Pm4b_V1CDS</i> | +         | S               | S               | S              |
| T1#12_2.9        | <i>Pm4b_V1CDS</i> | -         | S               | S               | S              |
| T1#12_2.10       | <i>Pm4b_V1CDS</i> | +         | S               | S               | S              |
| T1#12_2.11       | <i>Pm4b_V1CDS</i> | +         | S               | S               | S              |
| T1#12_2.12       | <i>Pm4b_V1CDS</i> | +         | S               | S               | S              |
| T1#12_2.13       | <i>Pm4b_V1CDS</i> | +         | S               | S               | S              |



|             |                   |   |   |   |   |
|-------------|-------------------|---|---|---|---|
| T1#12_2.14  | <i>Pm4b_V1CDS</i> | + | S | S | S |
| T1#12_2.15  | <i>Pm4b_V1CDS</i> | + | S | S | S |
| T1#12_2.16  | <i>Pm4b_V1CDS</i> | - | S | S | S |
| T1#19_1.1   | <i>Pm4b_V1CDS</i> | + | S | S | S |
| T1#19_1.2   | <i>Pm4b_V1CDS</i> | + | S | S | S |
| T1#19_1.4   | <i>Pm4b_V1CDS</i> | + | S | S | S |
| T1#19_1.5   | <i>Pm4b_V1CDS</i> | + | S | S | S |
| T1#19_1.6.1 | <i>Pm4b_V1CDS</i> | - | S | S | S |
| T1#19_1.6.2 | <i>Pm4b_V1CDS</i> | - | S | S | S |
| T1#19_1.7   | <i>Pm4b_V1CDS</i> | - | S | S | S |
| T1#19_1.9   | <i>Pm4b_V1CDS</i> | + | S | S | S |
| T1#19_1.10  | <i>Pm4b_V1CDS</i> | + | S | S | S |
| T1#19_1.11  | <i>Pm4b_V1CDS</i> | + | S | S | S |
| T1#19_1.12  | <i>Pm4b_V1CDS</i> | - | S | S | S |
| T1#19_1.13  | <i>Pm4b_V1CDS</i> | - | S | S | S |
| T1#19_1.14  | <i>Pm4b_V1CDS</i> | - | S | S | S |
| T1#19_1.15  | <i>Pm4b_V1CDS</i> | + | S | S | S |
| T1#19_1.16  | <i>Pm4b_V1CDS</i> | + | S | S | S |
| T1#6_3.2    | <i>Pm4b_V2CDS</i> | - | S | S | S |
| T1#6_3.3    | <i>Pm4b_V2CDS</i> | + | S | S | S |
| T1#6_3.4    | <i>Pm4b_V2CDS</i> | - | S | S | S |
| T1#6_3.5    | <i>Pm4b_V2CDS</i> | + | S | S | S |
| T1#6_3.6    | <i>Pm4b_V2CDS</i> | + | S | S | S |
| T1#6_3.7    | <i>Pm4b_V2CDS</i> | + | S | S | S |
| T1#6_3.8    | <i>Pm4b_V2CDS</i> | - | S | S | S |
| T1#6_3.11   | <i>Pm4b_V2CDS</i> | + | S | S | S |
| T1#6_3.12   | <i>Pm4b_V2CDS</i> | + | S | S | S |
| T1#6_3.13   | <i>Pm4b_V2CDS</i> | + | S | S | S |
| T1#6_3.14   | <i>Pm4b_V2CDS</i> | - | S | S | S |
| T1#6_3.16   | <i>Pm4b_V2CDS</i> | - | S | S | S |
| T1#24_1.1   | <i>Pm4b_V2CDS</i> | + | S | S | S |
| T1#24_1.2   | <i>Pm4b_V2CDS</i> | + | S | S | S |
| T1#24_1.3   | <i>Pm4b_V2CDS</i> | - | S | S | S |
| T1#24_1.4   | <i>Pm4b_V2CDS</i> | + | S | S | S |
| T1#24_1.5   | <i>Pm4b_V2CDS</i> | + | S | S | S |
| T1#24_1.6   | <i>Pm4b_V2CDS</i> | + | S | S | S |
| T1#24_1.7   | <i>Pm4b_V2CDS</i> | + | S | S | S |
| T1#24_1.8   | <i>Pm4b_V2CDS</i> | + | S | S | S |
| T1#24_1.10  | <i>Pm4b_V2CDS</i> | + | S | S | S |
| T1#24_1.11  | <i>Pm4b_V2CDS</i> | + | S | S | S |
| T1#24_1.12  | <i>Pm4b_V2CDS</i> | + | S | S | S |
| T1#24_1.13  | <i>Pm4b_V2CDS</i> | + | S | S | S |
| T1#24_1.14  | <i>Pm4b_V2CDS</i> | + | S | S | S |
| T1#24_1.15  | <i>Pm4b_V2CDS</i> | + | S | S | S |

|              |                   |   |   |   |   |
|--------------|-------------------|---|---|---|---|
| T1#24_1.16   | <i>Pm4b_V2CDS</i> | + | S | S | S |
| T1#29_2.1    | <i>Pm4b_V2CDS</i> | - | S | S | S |
| T1#29_2.2    | <i>Pm4b_V2CDS</i> | + | S | S | S |
| T1#29_2.3    | <i>Pm4b_V2CDS</i> | + | S | S | S |
| T1#29_2.4    | <i>Pm4b_V2CDS</i> | + | S | S | S |
| T1#29_2.5    | <i>Pm4b_V2CDS</i> | + | S | S | S |
| T1#29_2.6    | <i>Pm4b_V2CDS</i> | + | S | S | S |
| T1#29_2.7    | <i>Pm4b_V2CDS</i> | + | S | S | S |
| T1#29_2.8    | <i>Pm4b_V2CDS</i> | + | S | S | S |
| T1#29_2.9    | <i>Pm4b_V2CDS</i> | + | S | S | S |
| T1#29_2.10   | <i>Pm4b_V2CDS</i> | + | S | S | S |
| T1#29_2.12.1 | <i>Pm4b_V2CDS</i> | + | S | S | S |
| T1#29_2.12.2 | <i>Pm4b_V2CDS</i> | + | S | S | S |
| T1#29_2.13   | <i>Pm4b_V2CDS</i> | - | S | S | S |
| T1#29_2.14.1 | <i>Pm4b_V2CDS</i> | + | S | S | S |
| T1#29_2.14.2 | <i>Pm4b_V2CDS</i> | + | S | S | S |
| T1#29_2.15   | <i>Pm4b_V2CDS</i> | + | S | S | S |
| T1#29_2.16   | <i>Pm4b_V2CDS</i> | + | S | S | S |

**Supplementary Table 5 | Disease reactions of wheat cultivars carrying the *Pm4* locus challenged with selected *Bgt* isolates.** In the first column, WW refers to Whealbi Wheat lines from Pont et al6. Detailed passport information is available at [https://urgi.versailles.inra.fr/download/iwgsc/IWGSC\\_RefSeq\\_Annotations/v1.0/iwgsc\\_refseqv1.0\\_Whealbi\\_GWAS.zip](https://urgi.versailles.inra.fr/download/iwgsc/IWGSC_RefSeq_Annotations/v1.0/iwgsc_refseqv1.0_Whealbi_GWAS.zip). Second column specifies the *Pm4* allele. From third column on, disease reaction of each wheat line to selected *Bgt* isolates, where values refer to percentage of the surface area of tested leaf segments (means of four biological replicates). Note that disease reactions of the Fed-*Pm4a* and the Fed-*Pm4b* NILs genotypes are included in the top to facilitate the comparison of resistance spectra among *Pm4* alleles. In general, *Pm4b*-, *Pm4d*- and *Pm4h*-containing lines exhibit a very similar pattern that Fed-*Pm4a* and the Fed-*Pm4b* NILs, for example susceptible to *BgtJ1W2* and *Bgt97251* but resistant to *Bgt96224*, *Bgt94202*, *Bgt97223* *Bgt97266*. Five classes of host reactions R = resistance (0-10% of leaf area covered), I (10-25% of leaf area covered), IS (25-50% of leaf area covered), IS (50-75 % of leaf area covered) and S (>75% of leaf area covered). Infection test is based on four biological replicates.

| Line             | <i>Pm4</i> allele | <i>BgtJ1W2</i> | <i>Bgt94202</i> | <i>Bgt96224</i> | <i>Bgt96229</i> | <i>Bgt97028</i> | <i>Bgt97223</i> | <i>Bgt97251</i> | <i>Bgt97266</i> | <i>Bgt98013</i> | <i>Bgt98230</i> | <i>Bgt98250</i> |    |
|------------------|-------------------|----------------|-----------------|-----------------|-----------------|-----------------|-----------------|-----------------|-----------------|-----------------|-----------------|-----------------|----|
| Fed- <i>Pm4a</i> | <i>Pm4a</i>       | S              | R               | R               | S               | S               | R               | S               | R               | R               | S               | S               |    |
| Fed- <i>Pm4b</i> | <i>Pm4b</i>       | S              | R               | R               | IS              | S               | R               | S               | R               | R               | IS              | IS              |    |
| WW-001           | <i>Pm4b</i>       | S              | R               | R               | R               | I               | R               | I               | R               | S               | I               | I               |    |
| WW-009           |                   | S              | R               | R               | S               | IS              | R               | R               | R               | IR              | IS              | IS              |    |
| WW-012           |                   | S              | R               | R               | IS              | I               | R               | R               | R               | IR              | IS              | IS              |    |
| WW-017           |                   | R              | R               | R               | S               | R               | R               | R               | R               | R               | R               | R               | R  |
| WW-018           |                   | R              | R               | R               | R               | R               | R               | R               | R               | R               | R               | R               | R  |
| WW-019           |                   | S              | R               | R               | S               | IS              | R               | IS              | R               | IS              | I               | IS              |    |
| WW-021           |                   | S              | R               | R               | S               | IS              | R               | IS              | R               | IS              | IS              | IS              |    |
| WW-024           |                   | R              | R               | R               | S               | R               | R               | R               | R               | S               | R               | R               |    |
| WW-048           |                   | S              | R               | R               | R               | S               | R               | I               | R               | S               | S               | IS              |    |
| WW-049           |                   | IS             | S               | IS              | S               | S               | IR              | I               | R               | IS              | S               | I               |    |
| WW-156           |                   | R              | R               | R               | R               | IR              | IR              | R               | S               | R               | S               | IS              | IR |
| WW-161           |                   | S              | R               | R               | S               | I               | R               | S               | R               | S               | IS              | R               |    |
| WW-282           |                   | S              | R               | R               | S               | IR              | R               | I               | R               | S               | IS              | IS              |    |
| WW-286           |                   | S              | R               | R               | IS              | I               | R               | IS              | R               | IS              | I               | I               |    |
| WW-291           |                   | S              | R               | R               | S               | I               | R               | IS              | R               | IS              | R               | I               |    |
| WW-356           |                   | S              | R               | S               | S               | I               | R               | S               | R               | IS              | I               | S               |    |
| WW-399           |                   | S              | IS              | S               | S               | IS              | IS              | IS              | IS              | S               | S               | S               |    |
| WW-451           |                   | R              | R               | R               | IR              | IR              | R               | IS              | R               | I               | I               | I               |    |
| WW-508           |                   | IS             | R               | R               | R               | I               | R               | I               | R               | R               | S               | I               |    |
| WW-003           |                   | <i>Pm4d</i>    | S               | R               | R               | R               | I               | R               | I               | R               | I               | IS              | I  |
| WW-007           | IS                |                | R               | R               | S               | R               | R               | I               | R               | IS              | R               | IS              |    |
| WW-014           | S                 |                | R               | R               | S               | I               | R               | IS              | R               | IS              | IS              | I               |    |
| WW-037           | S                 |                | R               | R               | S               | S               | R               | R               | R               | I               | S               | S               |    |
| WW-042           | S                 |                | R               | R               | R               | S               | R               | R               | R               | I               | S               | IS              |    |
| WW-157           | S                 |                | R               | R               | S               | IS              | R               | IS              | R               | S               | IS              | I               |    |
| WW-162           | S                 |                | R               | R               | R               | I               | R               | I               | R               | IS              | IS              | IR              |    |
| WW-164           | S                 |                | R               | R               | I               | IS              | R               | IS              | R               | IS              | IS              | I               |    |
| WW-166           | S                 |                | R               | R               | R               | I               | R               | S               | R               | S               | IS              | I               |    |
| WW-085           | <i>Pm4f</i>       |                | S               | S               | S               | S               | S               | S               | S               | I               | S               | S               | IS |
| WW-110           |                   | S              | S               | S               | S               | S               | S               | IS              | S               | S               | S               | S               |    |
| WW-143           |                   | S              | S               | IS              | IS              | IS              | S               | S               | S               | S               | S               | IR              |    |
| WW-149           |                   | S              | S               | IS              | IS              | S               | S               | S               | S               | IS              | S               | R               |    |
| WW-243           |                   | R              | R               | R               | R               | R               | IR              | R               | R               | R               | R               | R               |    |
| WW-262           |                   | IS             | I               | I               | IS              | R               | IR              | IS              | R               | I               | I               | I               |    |
| WW-265           |                   | I              | IR              | IR              | IR              | IR              | IR              | I               | I               | IR              | IR              | IR              |    |
| WW-335           |                   | S              | IS              | I               | S               | S               | S               | IS              | I               | I               | S               | IS              |    |
| WW-336           |                   | R              | IS              | S               | IS              | IS              | I               | S               | R               | I               | S               | I               |    |
| WW-341           |                   | S              | S               | IS              | IS              | S               | S               | S               | S               | S               | IS              | IS              |    |
| WW-445           | S                 | S              | IS              | IR              | R               | S               | S               | S               | IS              | IS              | I               |                 |    |
| WW-093           | <i>Pm4g</i>       | S              | IS              | IS              | S               | S               | S               | S               | S               | S               | S               | S               |    |
| WW-213           |                   | IS             | S               | R               | I               | IR              | R               | R               | R               | R               | R               | R               |    |
| WW-470           |                   | S              | S               | S               | S               | I               | IS              | S               | I               | IS              | S               | I               |    |
| WW-474           | <i>Pm4h</i>       | S              | R               | R               | I               | R               | IR              | S               | R               | I               | R               | R               |    |

**Supplementary Table 6 | List of *Pm4* homologues found in different species within the Triticeae tribe** The first column displays the given name used in Supplementary Fig. 4. If annotated in the corresponding reference assembly (last column), the real name of each *Pm4* homologue is given in the second column. Third column specifies the species where is found the *Pm4* homologue, followed by the chromosome and its length and the hit positions corresponding to the beginning and end of the gene. chr: chromosome. Note that if a homologue does not have assigned a chromosome is due to the fact that that homologue was located in the “unknown” (Un) chromosome. If this was the case, the given name includes “Un”.

| Given name         | Real name           | Species                              | chr | chr length | blast_hit_1 | blast_hit_2 | Assembly mapping                        |
|--------------------|---------------------|--------------------------------------|-----|------------|-------------|-------------|-----------------------------------------|
| HORVU2Hr1G126810   | HORVU2Hr1G126810    | <i>Hordeum vulgare</i>               | 2H  | 686565487  | 675091299   | 675096975   | Barley HC Proteins May2016 <sup>7</sup> |
| AET2Gv21296200     | AET2Gv21296200      | <i>Aegilops tauschii</i>             | 2   | 658177745  | 648456981   | 648448441   | ASM34733v1 → Aet_v4.0                   |
| AET2Gv21296800     | AET2Gv21296800      | <i>Aegilops tauschii</i>             | 2   | 658177745  | 648669491   | 648660155   | ASM34733v1 → Aet_v4.0                   |
| AET2Gv21297100     | AET2Gv21297100      | <i>Aegilops tauschii</i>             | 2   | 658177745  | 649380150   | 649375185   | ASM34733v1 → Aet_v4.0                   |
| Pm4_Scer_2R-H1     | gene not annotated  | <i>Secale cereale</i>                | 2R  | 946003182  | 942144497   | 942135749   | Scer_Lo7_v1p1p0                         |
| Pm4_Scer_2R-H2     | gene not annotated  | <i>Secale cereale</i>                | 2R  | 946003182  | 942196000   | 942188331   | Scer_Lo7_v1p1p1                         |
| Pm4_Scer_2R-H3     | SECCE2Rv1G0142720.1 | <i>Secale cereale</i>                | 2R  | 946003182  | 942510789   | 942518886   | Scer_Lo7_v1p1p1                         |
| Pm4_DW_2B-H1       | gene not annotated  | <i>Triticum turgidum durum</i>       | 2B  | 803510855  | 783236667   | 783242710   | Tdur_Svevo_v2                           |
| Pm4_DW_Un-H1       | gene not annotated  | <i>Triticum turgidum durum</i>       | -   | -          | -           | -           |                                         |
| Pm4_DW_Un-H2       | gene not annotated  | <i>Triticum turgidum durum</i>       | -   | -          | -           | -           | Tdur_Svevo_v2                           |
| Pm4_Tu-H1          | gene not annotated  | <i>Triticum urartu</i>               | -   | -          | -           | -           | Tura                                    |
| Pm4_WEW_2A-H1      | gene not annotated  | <i>Triticum turgidum dicoccoides</i> | 2A  | 788103699  | 772507911   | 772501710   | Ttur_Zavitan_v2                         |
| Pm4_WEW_2A-H2      | TRITDC2AG081930     | <i>Triticum turgidum dicoccoides</i> | 2A  | 788103699  | 772732306   | 772727283   | Ttur_Zavitan_v2                         |
| Pm4_WEW_2A-H3      | gene not annotated  | <i>Triticum turgidum dicoccoides</i> | 2A  | 788103699  | 772765384   | 772758678   | Ttur_Zavitan_v2                         |
| Pm4_WEW_2B-H1      | TRITDC2BG090970     | <i>Triticum turgidum dicoccoides</i> | 2B  | 816754914  | 801015698   | 801021217   | Ttur_Zavitan_v2                         |
| Pm4_WEW_2B-H2      | TRITD2Bv1G265730    | <i>Triticum turgidum dicoccoides</i> | 2B  | 816754914  | 802467722   | 802462401   | Ttur_Zavitan_v2                         |
| TraesCS2A01G558500 | TraesCS2A01G558500  | <i>Triticum aestivum</i>             | 2A  | 796414552  | 761903162   | 761896325   | Taes_HC_2017_proteins <sup>8</sup>      |
| TraesCS2B01G621800 | TraesCS2B01G621800  | <i>Triticum aestivum</i>             | 2A  | 817281873  | 795988821   | 795978311   | Taes_HC_2017_proteins                   |

Supplementary Table 7 | Primers used in this study

| Primer               | Sequence                                      | Description                            | Function                                        |
|----------------------|-----------------------------------------------|----------------------------------------|-------------------------------------------------|
| GH438 (TI GH dT25VN) | CTATCAGCAACCATTGAGTCACGTCCTCAAAGATGCTCAdT25VN |                                        | 5' RACE                                         |
| GH439 (U-GH)         | CTATCAGCAACCATTGAGTCACG                       |                                        | 3' RACE                                         |
| GH377                | AGAGTGCAGAGACTTCAATCCA                        |                                        | 3' RACE                                         |
| GH432                | GCACGTTCCCACTCACGATTGCAATTGCT                 |                                        | 5' RACE                                         |
| GH398                | CCTTCACACGGCAAATCTGAA                         | Fw long-range                          | Full-length amp. <i>Pm4b_V1</i> transcript      |
| GH399                | GATGTGCACCAACTAACT                            | Rv long-range                          | Full-length amp. <i>Pm4b_V1</i> transcript      |
| GH400                | ATCAGAGTCTCTATCGCCCT                          | Fw nested                              | Full-length amp. <i>Pm4b_V1</i> transcript      |
| GH401                | CACCAACACTAACTGAAAGGAG                        | Rv nested                              | Full-length amp. <i>Pm4b_V1</i> transcript      |
| GH382                | GTTCCCACTCACGATTGTC                           | Sequencing                             | Seq of full-length <i>Pm4b_V1/V2</i> transcript |
| GH385                | TCGACGATAACATGGAACCCAA                        | Sequencing                             | Seq of full-length <i>Pm4b_V1/V2</i> transcript |
| GH387                | CACCATTGGAAGGATGAGCTG                         | Sequencing                             | Seq of full-length <i>Pm4b_V1/V2</i> transcript |
| GH397                | TAAAGATACAGATGGGCGGC                          | Sequencing                             | Seq of full-length <i>Pm4b_V1</i> transcript    |
| JS233                | ACTTTGCAATAGGCGGTTG                           | Sequencing                             | Seq of full-length <i>Pm4b_V1/V2</i> transcript |
| JS293                | AGTCACCACCAACATGAAGTC                         | Sequencing                             | Seq of full-length <i>Pm4b_V1</i> transcript    |
| GH398                | CCTTCACACGGCAAATCTGAA                         | Fw long-range                          | Full-length amp. <i>Pm4b_V2</i> transcript      |
| GH407                | AGTAATAACTCTACGCAACATGAAG                     | Rv long-range/semi-nested              | Full-length amp. <i>Pm4b_V2</i> transcript      |
| GH400                | ATCAGAGTCTCTATCGCCCT                          | Fw semi-nested                         | Full-length amp. <i>Pm4b_V2</i> transcript      |
| JS280                | CGCACATAGACATGACGCTG                          | Sequencing                             | Seq of full-length <i>Pm4b_V2</i> transcript    |
| JS292                | TGCATTCTGGACCCTGACTC                          | Sequencing                             | Seq of full-length <i>Pm4b_V2</i> transcript    |
| JS298                | TGGTCTCTAGCGTCATGGTC                          | Sequencing                             | Seq of full-length <i>Pm4b_V2</i> transcript    |
| JS540                | GACCATGACGCTAGAGACCA                          | Sequencing                             | Seq of full-length <i>Pm4b_V2</i> transcript    |
| JS717                | AGGTGGACATCTAGGCGCT                           | Forward                                | Haplotype marker                                |
| JS718                | GATCTGGGTACCACAGCACCG                         | Reverse                                | Haplotype marker                                |
| JS256                | GCTGAGTGATTTAATTTGTTCCGG                      | Fw long-range                          | Amp. Exon1-5 gDNA                               |
| JS257                | AGAAAAAGGCAACTATAGCCCAT                       | Rv long-range/nested                   | Amp. Exon1-5 gDNA                               |
| JS251                | TCTGACAAGTATATGTAGCAACCC                      | Fw nested                              | Amp. Exon1-5 gDNA                               |
| GH382                | GTTCCCACTCACGATTGTC                           | Sequencing                             | Seq Exon1-5 gDNA                                |
| GH384                | AAGCAGCTAGTTGGCTCATA                          | Sequencing                             | Seq Exon1-5 gDNA                                |
| GH385                | TCGACGATAACATGGAACCCAA                        | Sequencing                             | Seq Exon1-5 gDNA                                |
| JS255                | GTAGCAACCCAAATTAAGGAAGAA                      | Sequencing                             | Seq Exon1-5 gDNA                                |
| JS278                | ACTAACCAGTACTCTGCC                            | Fw long-range/nested                   | Amp. Exon6-7 gDNA                               |
| JS261                | CTTGCGTGGAGAAAGGAACAA                         | Rv long-range                          | Amp. Exon6-7 gDNA                               |
| GH407                | AGTAATAACTCTACGCAACATGAAG                     | Fw nested                              | Amp. Exon6-7 gDNA                               |
| JS280                | CGCACATAGACATGACGCTG                          | Sequencing                             | Seq Exon 6-7 gDNA                               |
| JS292                | TGCATTCTGGACCCTGACTC                          | Sequencing                             | Seq Exon 6-7 gDNA                               |
| GH387                | CACCATTGGAAGGATGAGCTG                         | Sequencing                             | Seq Exon 6-7 gDNA                               |
| GH397                | TAAAGATACAGATGGGCGGC                          | sequencing                             | Seq Exon 6-7 gDNA                               |
| GH402                | ACCACATTTACAGAGAGCTA                          | Sequencing                             | Seq Exon 6-7 gDNA                               |
| GH414                | TAGTGTGGAGAGATCACAACGA                        | Fw; Exon5-6; 179-bp                    | qRT-PCR <i>Pm4</i> expression                   |
| GH415                | CTGAGGTAGAGGAGGCAACTT                         | Rv; Exon5-6; 179-bp                    | qRT-PCR <i>Pm4</i> expression                   |
| GH377                | AGAGTGCAGAGACTTCAATCCA                        | Fw; Exon5-7; 159-bp                    | qRT-PCR <i>Pm4</i> expression                   |
| GH417                | TTCTTCGTACCCAGCAGGTC                          | Rv; Exon5-7; 159-bp                    | qRT-PCR <i>Pm4</i> expression                   |
| JS483                | CACCATGGAACACAAAAGTACCACAC                    | Universal forward                      | TOPO cloning <i>Pm4b_V1/2</i>                   |
| JS486                | TCAGGTCAGCAGGTGGTACT                          | Rv; stop codon                         | TOPO cloning <i>Pm4b_V1</i>                     |
| JS487                | GGTCAGCAGGTGGTACTCC                           | Rv; no stop codon                      | TOPO cloning <i>Pm4b_V1</i>                     |
| JS484                | TCACAGGAGCAGTCCC                              | Rv; stop codon                         | TOPO cloning <i>Pm4b_V2</i>                     |
| JS485                | CAGGAGCAGTCCC                                 | Rv; no stop codon                      | TOPO cloning <i>Pm4b_V2</i>                     |
| JS274                | TAAATTGGCGCGCCCATGGAACACAAAAGTACCACA          | Universal forward ( <i>Asc I</i> )     | Biostic bombardment                             |
| JS275                | CTCTCTTAATTAATTTACAGGAGCAGTCCC                | Rv ( <i>Pac I</i> )                    | Biostic bombardment <i>Pm4b_V2</i> CDS          |
| JS276                | TCTCTCTTAATTAATTTACAGGTCAGCAGGTGGTAC          | Rv ( <i>Pac I</i> )                    | Biostic bombardment <i>Pm4b_V1</i> CDS          |
| JS295                | CATCTGAGCCTTGAGACGGA                          | Fw sitting on Exon 6                   | Detection of transgene <i>Pm4b_V1</i> CDS       |
| JS297                | GAGGAAATGAAACTGCGCCT                          | Fw sitting on Exon 7                   | Detection of transgene <i>Pm4b_V2</i> CDS       |
| HZ010                | ATGTATAATTGCGGGACTCT                          | Universal Rv (nos terminator)          | Detection of transgene <i>Pm4b_V1/2</i> CDS     |
| JS189                | GCTTCGCAAGAGCGCCAT                            | Fw <i>Pm4b_V1_target_1</i> (Exon 6)    | VIGS of <i>Pm4b_V1</i>                          |
| JS190                | CCTTGCCCATCTGTGGTCTC                          | Rv <i>Pm4b_V1_target_1</i> (Exon 6)    | VIGS of <i>Pm4b_V1</i>                          |
| JS498                | GGCAGAAAGTGCCTCCTCTA                          | Fw <i>Pm4b_V2_target_1</i> (Exon 7)    | VIGS of <i>Pm4b_V2</i>                          |
| JS499                | GTTGTAGCGTGTGCTGGTGG                          | Rv <i>Pm4b_V2_target_1</i> (Exon 7)    | VIGS of <i>Pm4b_V2</i>                          |
| JS589                | GAACACAAAAGTACCACAC                           | N-terminal Flag tagging <i>Pm4b_V1</i> | Epitope tagging                                 |
| JS590                | CTTGTCGTCATCGTCTGTGATCCATGGTGAAGGG            | N-terminal Flag tagging <i>Pm4b_V1</i> | Epitope tagging                                 |
| JS601                | GATTATGCTGAACACAAAAGTACT                      | N-terminal HA-tagging <i>Pm4b_V1</i>   | Epitope tagging                                 |
| JS602                | TGGAACATCGTATGGATACATGGT                      | N-terminal HA-tagging <i>Pm4b_V1</i>   | Epitope tagging                                 |
| JS593                | GATGACGACAAGTAAAGGGTGGGCGCGCC                 | C-terminal Flag tagging <i>Pm4b_V2</i> | Epitope tagging                                 |
| JS594                | GTCCCTGTAGTCGGTCAGCAGGTGGTACTCCG              | C-terminal Flag tagging <i>Pm4b_V2</i> | Epitope tagging                                 |

|       |                                   |                                 |                 |
|-------|-----------------------------------|---------------------------------|-----------------|
| JS488 | TTCCAGATTATGCTTAAAAGGGTGGGCGCGCCG | C-terminal Flag tagging Pm4b_V2 | Epitope tagging |
| JS489 | CATCGTATGGATACAGGAGCACGTCCCC      | C-terminal Flag tagging Pm4b_V2 | Epitope tagging |

Supplementary Table 8 | Target-specific amplification efficiencies of the splicing variants *Pm4b\_V1* and *Pm4b\_V2* and the reference genes used in this study.

| gene / Target | gene ID                                                | position | primer                                                                 | amplicon length bp | efficiency (E) slope<br>r2 of calibration curve | reference                  |
|---------------|--------------------------------------------------------|----------|------------------------------------------------------------------------|--------------------|-------------------------------------------------|----------------------------|
| Pm4_V1        |                                                        | Exon 5-6 | F: TAGGTTGGAGAGATCACAAACGA (GH414)<br>R: CTGAGGTAGAGGAGGCAACTT (GH415) | 179                | E: 97.6 %<br>slope: -3.381<br>r2: 0.999         | this work                  |
| Pm4_V2        |                                                        | Exon 5-7 | F: AGAGTGCAGAGACTTCAATCCA (GH377)<br>R: TTCTTCGTACCCAGCAGGTC (GH417)   | 159                | E: 93.1 %<br>slope: -3.500<br>r2: 0.991         | this work                  |
| ADP           | TraesCS3B01G368600,<br>TraesCS3D01G330500<br>(TA.2291) | Exon 2   | F: TCTCATGGTTGGTCTCGATG (GH094)<br>R: GGATGGTGGTGACGATCTCT (GH095)     | 80                 | E: 98.2 %<br>slope: -3.365<br>r2: 0.999         | Giménez et al <sup>9</sup> |
| ZFL           | TraesCS3D01G432800,<br>TraesCS3A01G440000              | Exon 1   | F: CAGGCATCTCACTGGAGACT (GH105)<br>R: TGGCATCTCTTTGCTTCTG (GH106)      | 79                 | E: 96.7 %<br>slope: -3.403<br>r2: 0.989         | this work                  |
